# Supplementary material for: The oxic degradation of sedimentary organic matter 1400 Ma constrains atmospheric oxygen levels
Source: Copernicus journal article supplement (doi:10.5194/bg-14-2133-2017), 2017-04-26
Supplement: Supplementary file 1 [file bg-14-2133-2017-supplement.pdf]

Supplement of Biogeosciences, 14, 2133–2149, 2017  
<http://www.biogeosciences.net/14/2133/2017/>  
doi:10.5194/bg-14-2133-2017-supplement  
© Author(s) 2017. CC Attribution 3.0 License.

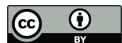

Biogeosciences  Open Access

*Supplement of*

## **The oxic degradation of sedimentary organic matter 1400 Ma constrains atmospheric oxygen levels**

**Shuichang Zhang et al.**

*Correspondence to:* Shuichang Zhang (sczhang@petrochina.com.cn)

The copyright of individual parts of the supplement might differ from the CC-BY 3.0 licence.

## The oxic degradation of sedimentary organic matter 1.4 Ga constrains atmospheric oxygen levels

### Supplementary Information

Table S1. Repeated analysis of standards by ICP-MS for V, Mo and U; by XRF for Al and Fe and by HHXRF for Fe.

| No       | Sample   | V<br>(ppm) | Mo<br>(ppm) | U<br>(ppm) | No | Sample   | Al<br>(wt%) | Fe<br>(wt%) | No | Sample  | HHXRF Fe<br>(wt%) |
|----------|----------|------------|-------------|------------|----|----------|-------------|-------------|----|---------|-------------------|
| 1        | GBW07309 | 99.6       | 0.62        | 2.48       | 1  | GBW07104 | 8.52        | 2.62        | 1  | PACS -3 | 4.08              |
| 2        | GBW07309 | 98.4       | 0.63        | 2.51       | 2  | GBW07104 | 8.54        | 2.61        | 2  | PACS -3 | 4.07              |
| 3        | GBW07309 | 93.3       | 0.67        | 2.57       | 3  | GBW07104 | 8.50        | 2.61        | 3  | PACS -3 | 3.99              |
| 4        | GBW07309 | 93.7       | 0.62        | 2.68       | 4  | GBW07104 | 8.51        | 2.61        | 4  | PACS -3 | 4.07              |
| 5        | GBW07309 | 99.9       | 0.61        | 2.50       | 5  | GBW07104 | 8.54        | 2.61        | 5  | PACS -3 | 3.93              |
| 6        | GBW07309 | 94.7       | 0.66        | 2.70       | 6  | GBW07104 | 8.54        | 2.62        | 6  | PACS -3 | 3.95              |
| 7        | GBW07309 | 96.5       | 0.67        | 2.48       | 7  | GBW07104 | 8.54        | 2.62        | 7  | PACS -3 | 3.98              |
| 8        | GBW07309 | 95.3       | 0.61        | 2.57       | 8  | GBW07104 | 8.54        | 2.62        | 8  | PACS -3 | 3.96              |
| 9        | GBW07309 | 93.9       | 0.64        | 2.56       | 9  | GBW07104 | 8.55        | 2.62        | 9  | PACS -3 | 3.95              |
| 10       | GBW07309 | 101.0      | 0.62        | 2.73       | 10 | GBW07104 | 8.54        | 2.63        | 10 | PACS -3 | 3.90              |
|          |          |            |             |            | 11 | GBW07104 | 8.54        | 2.61        | 11 | PACS -3 | 3.87              |
|          |          |            |             |            |    |          |             |             | 12 | PACS -3 | 3.95              |
|          |          |            |             |            |    |          |             |             | 13 | PACS -3 | 3.94              |
|          |          |            |             |            |    |          |             |             | 14 | PACS -3 | 3.95              |
| average  |          | 96.6       | 0.64        | 2.58       |    |          | 8.53        | 2.62        |    |         | 3.97              |
| std dev  |          | 2.9        | 0.02        | 0.09       |    |          | 0.02        | 0.01        |    |         | 0.06              |
| Accepted |          | 97.0       | 0.64        | 2.60       |    |          | 8.57        | 2.65        |    |         | 4.11              |
| 1        | GBW07310 | 104.0      | 1.21        | 2.04       | 1  | GBW07407 | 15.51       | 10.14       | 1  | XML Z4  | 5.97              |
| 2        | GBW07310 | 105.0      | 1.18        | 2.02       | 2  | GBW07407 | 15.48       | 10.14       | 2  | XML Z4  | 5.94              |
| 3        | GBW07310 | 104.0      | 1.26        | 2.21       | 3  | GBW07407 | 15.45       | 10.12       | 3  | XML Z4  | 5.87              |
| 4        | GBW07310 | 107.0      | 1.23        | 2.10       |    |          |             |             | 4  | XML Z4  | 5.90              |

|    |          |       |      |      |
|----|----------|-------|------|------|
| 5  | GBW07310 | 110.0 | 1.24 | 2.07 |
| 6  | GBW07310 | 109.0 | 1.23 | 2.15 |
| 7  | GBW07310 | 107.0 | 1.19 | 2.12 |
| 8  | GBW07310 | 105.0 | 1.26 | 2.00 |
| 9  | GBW07310 | 109.0 | 1.16 | 2.14 |
| 10 | GBW07310 | 106.0 | 1.17 | 2.09 |

|    |        |      |
|----|--------|------|
| 5  | XML Z4 | 5.86 |
| 6  | XML Z4 | 5.87 |
| 7  | XML Z4 | 5.87 |
| 8  | XML Z4 | 5.92 |
| 9  | XML Z4 | 5.85 |
| 10 | XML Z4 | 5.80 |
| 11 | XML Z4 | 5.91 |

|          |       |       |      |       |       |      |
|----------|-------|-------|------|-------|-------|------|
| average  | 106.6 | 1.21  | 2.09 | 15.48 | 10.13 | 5.89 |
| std dev  | 2.2   | 0.04  | 0.06 | 0.03  | 0.01  | 0.05 |
| Accepted | 107.0 | 1.200 | 2.10 | 15.51 | 10.13 | 5.83 |

Table S2. Geochemical data and sediment description for outcrop samples.

| Depth | Sediment | Org-C | $\delta^{13}\text{C}$ | Al    | Fe   | Fe/Al | V   | V/Al | Mo   | Mo/Al | U   | U/Al | HI      |
|-------|----------|-------|-----------------------|-------|------|-------|-----|------|------|-------|-----|------|---------|
| M     |          | wt%   | ‰                     | wt%   | wt%  |       | ppm |      | ppm  |       | ppm |      | mg/gTOC |
| 0     | black    | 1.14  | -34.1                 | 5.77  | 5.39 | 0.93  | 80  | 13.9 | 1.54 | 0.27  | 2.6 | 0.45 | 138     |
| 3.60  | green    | 0.27  | -31.7                 | 5.57  | 3.54 | 0.64  | 60  | 10.8 | 0.62 | 0.11  | 2.0 | 0.37 | 111     |
| 4.60  | gray     | 0.20  | -32.9                 | 6.76  | 2.95 | 0.44  | 74  | 10.9 | 0.67 | 0.10  | 2.8 | 0.41 | 100     |
| 6.10  | black    | 2.25  |                       | 6.90  | 3.26 | 0.47  | 112 | 16.2 | 2.2  | 0.32  | 3.0 | 0.43 | 318     |
| 7.60  | black    | 3.32  | -33.4                 | 6.95  | 3.31 | 0.48  | 163 | 23.4 | 5.28 | 0.76  | 4.0 | 0.58 | 373     |
| 9.10  | black    | 2.65  |                       | 6.73  | 3.42 | 0.51  | 203 | 30.2 | 4.63 | 0.69  | 3.8 | 0.56 | 353     |
| 10.10 | black    | 2.21  | -33.4                 | 6.72  | 3.27 | 0.49  | 126 | 18.8 | 3.32 | 0.49  | 3.1 | 0.46 | 313     |
| 11.10 | gray     | 0.09  | -33.3                 | 7.80  | 2.03 | 0.26  | 86  | 11.0 | 1.06 | 0.14  | 2.9 | 0.38 | 67      |
| 12.10 | black    | 3.37  | -32.8                 | 7.57  | 3.22 | 0.43  | 221 | 29.2 | 5.48 | 0.72  | 4.7 | 0.63 | 353     |
| 14.10 | gray     | 0.94  |                       | 4.54  | 1.95 | 0.43  | 44  | 9.8  | 1.21 | 0.27  | 2.0 | 0.44 | 220     |
| 14.60 | black    | 3.86  | -33.0                 | 9.06  | 2.28 | 0.25  | 239 | 26.4 | 3.25 | 0.36  | 4.9 | 0.54 | 338     |
| 15.60 | gray     | 0.23  | -32.7                 | 10.10 | 2.22 | 0.22  | 132 | 13.1 | 0.83 | 0.08  | 4.0 | 0.40 | 43      |
| 15.80 | gray     | 0.20  |                       | 10.09 | 2.57 | 0.25  | 109 | 10.8 | 0.91 | 0.09  | 3.6 | 0.36 | 55      |
| 17.10 | gray     | 0.26  | -32.3                 | 9.49  | 2.07 | 0.22  | 114 | 12.0 | 1.29 | 0.14  | 4.4 | 0.46 | 62      |
| 18.60 | gray     | 0.24  |                       | 9.20  | 2.95 | 0.32  | 89  | 9.7  | 1.88 | 0.20  | 3.6 | 0.39 | 71      |
| 20.10 | gray     | 0.18  |                       | 9.54  | 2.73 | 0.29  | 112 | 11.7 | 1.33 | 0.14  | 3.4 | 0.36 | 72      |
| 21.60 | black    | 3.92  | -32.4                 | 8.18  | 4.20 | 0.51  | 245 | 29.9 | 7.22 | 0.88  | 5.0 | 0.61 | 319     |
| 22.50 | gray     | 0.30  | -32.2                 | 9.35  | 2.62 | 0.28  | 106 | 11.3 | 1.46 | 0.16  | 3.9 | 0.41 | 93      |
| 22.60 | gray     | 0.15  | -31.6                 | 9.07  | 2.62 | 0.29  | 103 | 11.4 | 1.83 | 0.20  | 3.8 | 0.42 | 80      |
| 26.10 | black    | 3.53  |                       | 7.64  | 4.53 | 0.59  | 223 | 29.2 | 5.34 | 0.70  | 4.6 | 0.60 | 310     |
| 26.60 | gray     | 0.40  | -32.0                 | 8.60  | 2.73 | 0.32  | 108 | 12.6 | 2.22 | 0.26  | 4.1 | 0.47 | 113     |
| 27.60 | black    | 3.64  | -32.7                 | 8.27  | 3.64 | 0.44  | 200 | 24.2 | 4.48 | 0.54  | 5.6 | 0.68 | 336     |
| 28.40 | gray     | 0.43  |                       | 8.65  | 2.50 | 0.29  | 119 | 13.7 | 1.94 | 0.22  | 4.6 | 0.53 | 128     |
| 28.50 | black    | 3.91  | -32.2                 | 7.76  | 4.18 | 0.54  | 259 | 33.4 | 7.72 | 0.99  | 6.6 | 0.85 | 287     |
| 29.00 | gray     | 0.24  |                       | 8.78  | 1.90 | 0.22  | 105 | 12.0 | 1.03 | 0.12  | 3.7 | 0.42 | 104     |
| 29.10 | black    | 3.28  |                       | 8.15  | 3.85 | 0.47  | 271 | 33.2 | 7.04 | 0.86  | 6.3 | 0.78 | 241     |
| 29.50 | gray     | 0.30  |                       | 9.09  | 2.15 | 0.24  | 112 | 12.3 | 1.55 | 0.17  | 4.4 | 0.48 | 107     |

|       |       |      |       |      |      |      |     |      |      |      |     |      |     |
|-------|-------|------|-------|------|------|------|-----|------|------|------|-----|------|-----|
| 29.60 | black | 2.41 |       | 7.81 | 3.56 | 0.46 | 132 | 16.9 | 4.36 | 0.56 | 5.3 | 0.67 | 256 |
| 30.10 | gray  | 0.19 | -32.8 | 9.29 | 1.72 | 0.19 | 100 | 10.8 | 0.62 | 0.07 | 3.4 | 0.37 | 89  |
| 31.10 | black | 2.84 |       | 8.07 | 4.19 | 0.52 | 169 | 20.9 | 4    | 0.50 | 5.9 | 0.72 | 205 |
| 34.10 | black | 3.02 |       | 7.96 | 3.70 | 0.47 | 148 | 18.6 | 3.91 | 0.49 | 4.3 | 0.54 | 343 |
| 35.60 | gray  | 0.35 | -32.5 | 8.36 | 1.49 | 0.18 | 110 | 13.2 | 1.07 | 0.13 | 3.2 | 0.39 | 120 |
| 36.60 | gray  | 0.53 |       | 8.34 | 1.63 | 0.20 | 114 | 13.7 | 1.29 | 0.15 | 3.4 | 0.40 | 160 |
| 37.60 | black | 3.42 | -33.0 | 7.93 | 2.08 | 0.26 | 216 | 27.2 | 5.5  | 0.69 | 5.2 | 0.66 | 430 |
| 39.00 | gray  | 0.30 | -32.7 | 8.71 | 1.84 | 0.21 | 122 | 14.0 | 0.89 | 0.10 | 4.1 | 0.47 | 127 |
| 39.10 | gray  | 0.19 | -31.7 | 8.37 | 1.72 | 0.20 | 77  | 9.2  | 0.66 | 0.08 | 3.1 | 0.37 | 100 |
| 40.60 | gray  | 0.15 |       | 8.11 | 1.93 | 0.24 | 80  | 9.9  | 0.68 | 0.08 | 3.0 | 0.37 | 73  |
| 42.10 | gray  | 0.26 | -32.4 | 8.14 | 2.52 | 0.31 | 114 | 14.0 | 1.33 | 0.16 | 4.3 | 0.53 | 135 |
| 43.70 | black | 2.51 | -33.7 | 6.70 | 4.32 | 0.64 | 197 | 29.4 | 7.93 | 1.18 | 4.8 | 0.71 | 314 |
| 43.75 | gray  | 0.28 |       | 7.85 | 2.33 | 0.30 | 101 | 12.9 | 1.17 | 0.15 | 3.8 | 0.49 | 139 |
| 43.80 | black | 3.68 | -32.9 | 7.39 | 3.71 | 0.50 | 189 | 25.6 | 5.58 | 0.75 | 3.9 | 0.53 | 390 |
| 43.90 | gray  | 0.31 | -31.9 | 7.55 | 1.82 | 0.24 | 104 | 13.8 | 1.07 | 0.14 | 4.1 | 0.54 | 145 |
| 43.94 | black | 3.10 |       | 7.40 | 2.46 | 0.33 | 176 | 23.8 | 5.21 | 0.70 | 5.3 | 0.72 | 342 |
| 43.95 | gray  | 0.25 |       | 7.30 | 1.31 | 0.18 | 93  | 12.8 | 1.06 | 0.15 | 3.8 | 0.52 | 136 |
| 44.00 | black | 3.17 |       | 7.09 | 4.09 | 0.58 | 249 | 35.1 | 10   | 1.41 | 5.6 | 0.78 | 302 |
| 44.10 | black | 3.51 | -33.3 | 7.03 | 3.21 | 0.46 | 246 | 35.0 | 7.65 | 1.09 | 6.0 | 0.85 | 403 |
| 44.40 | black | 3.40 | -33.6 | 7.04 | 3.56 | 0.51 | 238 | 33.8 | 7.58 | 1.08 | 6.2 | 0.88 | 385 |
| 44.70 | black | 2.48 | -33.8 | 6.69 | 3.53 | 0.53 | 178 | 26.6 | 6.75 | 1.01 | 4.7 | 0.70 | 363 |

Table S3. Fe speciation results from fresh core material

| Depth | TOC  | FeT  | FeCARB | FeOX | FeMAG | FePy | FePy/FeHR | FeHR/FeT | FeT method |
|-------|------|------|--------|------|-------|------|-----------|----------|------------|
| M     | wt%  | wt%  | wt%    | wt%  | wt%   | wt%  |           |          |            |
| 15.00 | 2.14 | 3.72 | 0.37   | 0.19 | 0.24  | 0.41 | 0.34      | 0.33     | HCl        |
| 15.71 | 0.21 | 2.71 | 0.05   | 0.16 | 0.03  | 0.19 | 0.44      | 0.16     | HCl        |
| 16.66 | 0.31 | 4.31 | 0.19   | 0.05 | 0.17  | 0.51 | 0.55      | 0.22     | HCl        |
| 17.85 | 0.36 | 4.13 | 0.34   | 0.05 | 0.10  | 0.77 | 0.61      | 0.30     | XRF        |
| 18.33 | 0.31 | 3.22 | 0.22   | 0.11 | 0.13  | 0.50 | 0.52      | 0.30     | XRF        |
| 18.8  | 0.39 | 4.71 | 0.47   | 0.09 | 0.23  | 0.78 | 0.49      | 0.33     | XRF        |
| 19.21 | 3.55 | 2.50 | 0.35   | 0.04 | 0.02  | 1.50 | 0.78      | 0.76     | HHXRF      |
| 19.75 | 0.41 | 4.14 | 0.47   | 0.06 | 0.14  | 0.72 | 0.52      | 0.34     | HCl        |
| 20.94 | 0.39 | 3.61 | 0.16   | 0.03 | 0.06  | 0.75 | 0.75      | 0.28     | HCl        |
| 21.89 | 0.53 | 4.00 | 0.24   | 0.03 | 0.09  | 0.97 | 0.73      | 0.33     | Wet        |
| 22.13 | 1.66 | 3.82 | 0.65   | 0.16 | 0.24  | 0.58 | 0.35      | 0.43     | XRF        |
| 22.84 | 0.38 | 3.51 | 0.15   | 0.03 | 0.06  | 0.71 | 0.74      | 0.27     | HCl        |
| 23.79 | 0.26 | 3.98 | 0.41   | 0.06 | 0.22  | 0.36 | 0.34      | 0.27     | HCl        |
| 24.74 | 0.18 | 4.62 | 0.24   | 0.05 | 0.26  | 0.33 | 0.38      | 0.19     | HCl        |
| 24.98 | 0.51 | 2.86 | 0.15   | 0.10 | 0.08  | 0.60 | 0.65      | 0.32     | XRF        |
| 25.46 | 3.92 | 5.60 | 1.26   | 0.15 | 0.31  | 1.46 | 0.46      | 0.57     | HHXRF      |
| 25.69 | 0.27 | 3.71 | 0.11   | 0.05 | 0.11  | 0.57 | 0.67      | 0.23     | HCl        |
| 25.93 | 0.79 | 5.65 | 0.18   | 0.04 | 0.15  | 1.09 | 0.74      | 0.26     | HHXRF      |
| 26.41 | 0.86 | 6.10 | 0.21   | 0.04 | 0.15  | 0.61 | 0.60      | 0.17     | HHXRF      |
| 26.64 | 0.29 | 3.64 | 0.20   | 0.05 | 0.09  | 0.83 | 0.71      | 0.32     | HCl        |
| 26.88 | 0.47 | 3.75 | 0.13   | 0.03 | 0.12  | 0.73 | 0.72      | 0.27     | HHXRF      |
| 27.36 | 0.93 | 5.35 | 0.14   | 0.04 | 0.12  | 0.52 | 0.64      | 0.15     | HHXRF      |
| 27.59 | 0.45 | 3.74 | 0.12   | 0.04 | 0.06  | 0.69 | 0.76      | 0.24     | HCl        |
| 27.83 | 0.47 | 2.88 | 0.08   | 0.06 | 0.03  | 0.73 | 0.81      | 0.31     | XRF        |
| 28.30 | 2.91 | 3.56 | 0.18   | 0.04 | 0.15  | 1.43 | 0.79      | 0.51     | HHXRF      |

|       |      |      |      |      |      |      |      |      |       |
|-------|------|------|------|------|------|------|------|------|-------|
| 28.54 | 0.99 | 3.58 | 0.17 | 0.04 | 0.09 | 1.08 | 0.78 | 0.39 | HCl   |
| 28.78 | 1.10 | 2.71 | 0.10 | 0.04 | 0.09 | 0.79 | 0.77 | 0.37 | HHXRF |
| 29.26 | 1.02 | 3.07 | 0.23 | 0.08 | 0.14 | 1.23 | 0.74 | 0.54 | HHXRF |
| 29.49 | 0.42 | 3.76 | 0.18 | 0.04 | 0.09 | 0.97 | 0.76 | 0.34 | HCl   |
| 29.73 | 0.67 | 2.85 | 0.21 | 0.05 | 0.12 | 0.79 | 0.68 | 0.41 | HHXRF |
| 29.96 | 0.47 | 3.21 | 0.18 | 0.04 | 0.03 | 0.94 | 0.79 | 0.37 | HCl   |
| 30.21 | 0.51 | 2.68 | 0.08 | 0.04 | 0.09 | 0.68 | 0.76 | 0.34 | HHXRF |
| 30.44 | 0.32 | 2.97 | 0.10 | 0.03 | 0.04 | 0.46 | 0.72 | 0.21 | HCl   |
| 30.68 | 2.52 | 3.72 | 0.70 | 0.11 | 0.10 | 0.63 | 0.41 | 0.42 | XRF   |
| 31.16 | 3.59 | 3.37 | 0.66 | 0.14 | 0.19 | 0.74 | 0.43 | 0.51 | HHXRF |
| 31.39 | 0.43 | 3.33 | 0.30 | 0.04 | 0.08 | 0.93 | 0.69 | 0.41 | HCl   |
| 31.63 | 0.44 | 2.57 | 0.07 | 0.05 | 0.05 | 0.67 | 0.80 | 0.33 | HHXRF |
| 32.11 | 1.08 | 3.41 | 0.27 | 0.05 | 0.09 | 1.38 | 0.77 | 0.53 | HHXRF |
| 32.34 | 0.34 | 2.94 | 0.14 | 0.04 | 0.04 | 0.59 | 0.74 | 0.27 | HCl   |
| 32.58 | 0.71 | 2.84 | 0.12 | 0.05 | 0.05 | 1.11 | 0.84 | 0.47 | HHXRF |
| 33.06 | 0.72 | 3.01 | 0.33 | 0.06 | 0.09 | 0.93 | 0.66 | 0.47 | HHXRF |
| 33.29 | 0.87 | 4.88 | 0.37 | 0.05 | 0.08 | 2.21 | 0.82 | 0.56 | HCl   |
| 33.53 | 3.36 | 3.20 | 0.55 | 0.08 | 0.03 | 1.73 | 0.72 | 0.75 | XRF   |
| 34.01 | 3.41 | 3.48 | 0.46 | 0.07 | 0.07 | 2.03 | 0.77 | 0.75 | HHXRF |
| 34.48 | 4.20 | 3.50 | 0.60 | 0.11 | 0.08 | 2.08 | 0.72 | 0.82 | HHXRF |
| 34.96 | 3.50 | 3.39 | 0.59 | 0.09 | 0.12 | 1.82 | 0.69 | 0.77 | HHXRF |
| 35.43 | 3.16 | 3.68 | 1.76 | 0.11 | 0.01 | 1.29 | 0.41 | 0.86 | HHXRF |
| 35.91 | 4.77 | 3.06 | 0.40 | 0.06 | 0.04 | 1.78 | 0.78 | 0.74 | HHXRF |
| 36.38 | 4.79 | 3.38 | 1.38 | 0.08 | 0.08 | 0.80 | 0.34 | 0.69 | XRF   |
| 36.86 | 3.95 | 3.04 | 0.43 | 0.07 | 0.04 | 1.80 | 0.77 | 0.77 | HHXRF |
| 37.33 | 4.94 | 3.04 | 0.54 | 0.07 | 0.04 | 1.85 | 0.74 | 0.82 | HHXRF |
| 37.81 | 4.01 | 3.00 | 0.40 | 0.06 | 0.04 | 1.80 | 0.78 | 0.77 | HHXRF |
| 38.28 | 3.52 | 3.20 | 0.51 | 0.07 | 0.04 | 1.92 | 0.76 | 0.79 | HHXRF |
| 38.76 | 3.11 | 2.90 | 0.49 | 0.07 | 0.06 | 1.40 | 0.69 | 0.70 | HHXRF |

|       |      |      |      |      |      |      |      |      |       |
|-------|------|------|------|------|------|------|------|------|-------|
| 39.23 | 2.61 | 3.60 | 0.00 | 0.03 | 0.01 | 2.16 | 0.98 | 0.61 | XRF   |
| 39.71 | 4.45 | 3.20 | 0.41 | 0.06 | 0.04 | 1.94 | 0.79 | 0.76 | HHXRF |
| 40.18 | 4.07 | 2.89 | 0.38 | 0.05 | 0.04 | 1.51 | 0.76 | 0.69 | HHXRF |
| 40.66 | 4.03 | 3.41 | 0.42 | 0.05 | 0.03 | 2.38 | 0.83 | 0.85 | HHXRF |
| 41.13 | 3.74 | 3.48 | 0.60 | 0.07 | 0.04 | 2.24 | 0.76 | 0.85 | HHXRF |
| 41.61 | 4.70 | 3.49 | 0.66 | 0.08 | 0.04 | 2.50 | 0.76 | 0.94 | HHXRF |
| 42.08 | 1.68 | 1.16 | 0.11 | 0.04 | 0.04 | 0.11 | 0.38 | 0.25 | XRF   |
| 42.56 | 2.98 | 2.73 | 0.39 | 0.03 | 0.06 | 1.74 | 0.78 | 0.81 | HHXRF |
| 43.03 | 4.40 | 3.13 | 0.47 | 0.05 | 0.03 | 1.97 | 0.78 | 0.81 | HHXRF |
| 43.51 | 4.20 | 3.28 | 0.51 | 0.05 | 0.03 | 2.24 | 0.79 | 0.86 | HHXRF |
| 43.98 | 3.16 | 3.08 | 0.48 | 0.02 | 0.03 | 1.95 | 0.79 | 0.81 | HHXRF |
| 44.46 | 4.83 | 3.08 | 0.53 | 0.05 | 0.03 | 2.19 | 0.78 | 0.91 | HHXRF |
| 44.93 | 3.93 | 2.39 | 0.54 | 0.04 | 0.01 | 1.16 | 0.66 | 0.73 | XRF   |



Table S4. Parameters used to calculate O<sub>2</sub> exposure time and OC burial efficiencies

| site                       | Depth | O <sub>2</sub> pen. | Sed rate              | OrgC | O <sub>2</sub> uptake rate                           | O <sub>2</sub> exposure time | Burial eff. | ref                                        |
|----------------------------|-------|---------------------|-----------------------|------|------------------------------------------------------|------------------------------|-------------|--------------------------------------------|
|                            | m     | cm                  | cm y <sup>-1</sup>    | wt%  | mmol O <sub>2</sub> cm <sup>-2</sup> y <sup>-1</sup> | years                        | %           |                                            |
| Cape lookout Bight         | 10    | 0.30                | 5.4x10 <sup>0</sup>   | 3.0  | 2.1x10 <sup>0</sup>                                  | 5.6x10 <sup>-2</sup>         | 83.0        | (Canfield, 1989)                           |
| Aarhus Bay                 | 16    | 0.60                | 1.7x10 <sup>-1</sup>  | 2.0  | 6.5x10 <sup>-1</sup>                                 | 3.6x10 <sup>0</sup>          | 25.0        | (Jørgensen, 1996; Thamdrup et al., 1994)   |
| Kattegat/Skagerrak Sta 2   | 25    | 0.25                | 1.3x10 <sup>-1</sup>  | 1.5  | 6.3x10 <sup>-1</sup>                                 | 1.9x10 <sup>0</sup>          | 16.6        | (Jørgensen and Revsbech, 1989)             |
| Young Sound, Greenland     | 36    | 1.00                | 1.2x10 <sup>-1</sup>  | 1.3  | 2.4x10 <sup>-1</sup>                                 | 8.5x10 <sup>0</sup>          | 29.6        | (Rysgaard et al., 1998)                    |
| Katt/Skagerrak Sta 6       | 43    | 0.42                | 2.6x10 <sup>-1</sup>  | 1.4  | 3.9x10 <sup>-1</sup>                                 | 1.6x10 <sup>0</sup>          | 37.6        | (Jørgensen and Revsbech, 1989)             |
| Katt/Skagerrak Sta 9       | 65    | 0.55                | 2.6x10 <sup>-1</sup>  | 1.7  | 4.4x10 <sup>-1</sup>                                 | 2.1x10 <sup>0</sup>          | 39.0        | (Jørgensen and Revsbech, 1989)             |
| Katt/Skagerrak Sta 10      | 73    | 0.30                | 2.6x10 <sup>-1</sup>  | 1.8  | 8.3x10 <sup>-1</sup>                                 | 1.2x10 <sup>0</sup>          | 27.0        | (Jørgensen and Revsbech, 1989)             |
| Svalbard Sta 3             | 115   | 0.96                | 3.6x10 <sup>-1</sup>  | 1.8  | 4.8x10 <sup>-1</sup>                                 | 2.6x10 <sup>0</sup>          | 46.7        | (Glud et al., 1998; Sagemann et al., 1998) |
| Svalbard Sta 2             | 155   | 0.55                | 6.1x10 <sup>-1</sup>  | 1.5  | 6.0x10 <sup>-1</sup>                                 | 9.0x10 <sup>-1</sup>         | 49.5        | (Glud et al., 1998; Sagemann et al., 1998) |
| Svalbard Sta 5             | 175   | 1.10                | 1.8x10 <sup>-1</sup>  | 2.5  | 3.2x10 <sup>-1</sup>                                 | 6.0x10 <sup>0</sup>          | 47.7        | (Glud et al., 1998; Sagemann et al., 1998) |
| Katt/Skagerrak Sta 12      | 200   | 0.32                | 2.6x10 <sup>-1</sup>  | 2.4  | 5.0x10 <sup>-1</sup>                                 | 1.2x10 <sup>0</sup>          | 44.4        | (Jørgensen and Revsbech, 1989)             |
| California slope Sta K     | 1000  | 0.50                | 6.2x10 <sup>-3</sup>  | 3.9  | 4.3x10 <sup>-2</sup>                                 | 8.0x10 <sup>1</sup>          | 26.6        | (Reimers et al., 1992)                     |
| Chilean coast Sta 40       | 1015  | 0.60                | 3.1x10 <sup>-2</sup>  | 2.0  | 2.1x10 <sup>-1</sup>                                 | 1.9x10 <sup>1</sup>          | 16.0        | (Thamdrup and Canfield, 1996)              |
| Northeast Atlantic Sta B   | 1023  | 1.60                | 1.6x10 <sup>-3</sup>  | 0.3  | 5.4x10 <sup>-2</sup>                                 | 1.0x10 <sup>3</sup>          | 0.6         | (Lohse et al., 1998)                       |
| California rise Sta D      | 1440  | 1.00                | 1.0x10 <sup>-3</sup>  | 1.7  | 3.5x10 <sup>-2</sup>                                 | 9.6x10 <sup>2</sup>          | 3.1         | (Reimers et al., 1992)                     |
| California rise Sta L      | 1890  | 0.90                | 3.0x10 <sup>-3</sup>  | 1.2  | 5.3x10 <sup>-2</sup>                                 | 3.0x10 <sup>2</sup>          | 4.2         | (Reimers et al., 1992)                     |
| San Clemente Basin         | 1900  | 0.80                | 2.0 x10 <sup>-2</sup> | 2.0  | 4.5 x10 <sup>-2</sup>                                | 4.1x10 <sup>1</sup>          | 36.0        | (Bender et al., 1989)                      |
| Chilean coast Sta 41       | 2000  | 0.60                | 3.5x10 <sup>-2</sup>  | 2.2  | 1.7x10 <sup>-1</sup>                                 | 1.7x10 <sup>1</sup>          | 20.9        | (Thamdrup and Canfield, 1996)              |
| Borderland Basins-SCI      | 2053  | 0.70                | 2.0x10 <sup>-2</sup>  | 2.6  | 4.0 x10 <sup>-2</sup>                                | 3.6x10 <sup>1</sup>          | 45.0        | (Berelson et al., 1996; Reimers, 1987)     |
| California rise Sta H      | 3580  | 1.50                | 3.6x10 <sup>-3</sup>  | 2.0  | 6.2x10 <sup>-2</sup>                                 | 4.1x10 <sup>2</sup>          | 7.0         | (Reimers et al., 1992)                     |
| Borderland Basins-PE       | 3707  | 2.00                | 3.9x10 <sup>-2</sup>  | 1.1  | 1.4x10 <sup>-2</sup>                                 | 5.1x10 <sup>2</sup>          | 17.0        | (Berelson et al., 1996)                    |
| Northeast Atlantic Sta III | 3719  | 5.50                | 2.1x10 <sup>-3</sup>  | 0.4  | 5.7x10 <sup>-2</sup>                                 | 2.6x10 <sup>3</sup>          | 0.9         | (Lohse et al., 1998)                       |
| California rise Sta M      | 3730  | 1.60                | 1.3 x10 <sup>-2</sup> | 2.8  | 6.4x10 <sup>-2</sup>                                 | 1.2x10 <sup>2</sup>          | 26.7        | (Reimers, 1987; Reimers et al., 1992)      |
| Northeast Atlantic Sta E   | 4486  | 10.00               | 2.3x10 <sup>-3</sup>  | 0.4  | 3.6x10 <sup>-2</sup>                                 | 4.3x10 <sup>3</sup>          | 1.6         | (Lohse et al., 1998)                       |

Table S5. O<sub>2</sub> penetration depths, bottom water O<sub>2</sub> levels and sediment O<sub>2</sub> uptake rates for modern sediments.

| Site                      | Water depth (m) | O <sub>2</sub> pen. (cm) | BW O <sub>2</sub> (μM) | O <sub>2</sub> uptake mmol cm <sup>-2</sup> y <sup>-1</sup> | reference                      |
|---------------------------|-----------------|--------------------------|------------------------|-------------------------------------------------------------|--------------------------------|
| Cape lookout Bight        | 10              | 0.30                     | 250                    | 2.050                                                       | (Chanton et al., 1987)         |
| Western Pac sta I         | 4765            | 60.00                    | 250                    | 0.005                                                       | (Murray and Grundmanis, 1980)  |
| Western Pac Sta J         | 5361            | 60.00                    | 250                    | 0.005                                                       | (Murray and Grundmanis, 1980)  |
| Western Pac StaK          | 5469            | 20.00                    | 250                    | 0.008                                                       | (Murray and Grundmanis, 1980)  |
| Kattegat/Skagerrak Sta3   | 15              | 0.20                     | 250                    | 0.800                                                       | (Jørgensen and Revsbech, 1989) |
| Kattegat/Skagerrak Sta 8  | 17              | 0.45                     | 250                    | 0.550                                                       | (Jørgensen and Revsbech, 1989) |
| Kattegat/Skagerrak Sta 2  | 25              | 0.25                     | 250                    | 0.630                                                       | (Jørgensen and Revsbech, 1989) |
| Kattegat/Skagerrak Sta 6  | 43              | 0.42                     | 250                    | 0.390                                                       | (Jørgensen and Revsbech, 1989) |
| Kattegat/Skagerrak Sta 9  | 65              | 0.55                     | 250                    | 0.440                                                       | (Jørgensen and Revsbech, 1989) |
| Kattegat/Skagerrak Sta 10 | 73              | 0.30                     | 250                    | 0.830                                                       | (Jørgensen and Revsbech, 1989) |
| Kattegat/Skagerrak Sta 12 | 200             | 0.32                     | 250                    | 0.500                                                       | (Jørgensen and Revsbech, 1989) |
| Central Calif slope-rise  | 791             | 0.40                     | 250                    | 0.037                                                       | (Reimers et al., 1992)         |
| Skagerrak S4              | 190             | 0.70                     | 250                    | 0.580                                                       | (Canfield et al., 1993)        |
| Skagerrak S9              | 695             | 1.60                     | 250                    | 0.400                                                       | (Canfield et al., 1993)        |
| Chile sta 40              | 1015            | 0.60                     | 250                    | 0.210                                                       | (Thamdrup and Canfield, 1996)  |
| Chile sta 41              | 2000            | 0.60                     | 250                    | 0.170                                                       | (Thamdrup and Canfield, 1996)  |
| Svalbard Sta 3            | 115             | 0.96                     | 250                    | 0.480                                                       | (Glud et al., 1998)            |
| Svalbard sta 4            | 138             | 0.93                     | 250                    | 0.440                                                       | (Glud et al., 1998)            |
| Svalbard sta 5            | 175             | 1.10                     | 250                    | 0.320                                                       | (Glud et al., 1998)            |
| Svalbard Sta 2            | 155             | 0.55                     | 250                    | 0.600                                                       | (Glud et al., 1998)            |
| S. Atlantic Geob 1713     | 604             | 0.40                     | 250                    | 0.340                                                       | (Glud et al., 1994)            |
| S. Atlantic Geob 1719     | 1015            | 1.20                     | 250                    | 0.410                                                       | (Glud et al., 1994)            |
| S. Atlantic Geob 1703     | 1747            | 1.10                     | 250                    | 0.566                                                       | (Glud et al., 1994)            |
| S. Atlantic Geob 1711     | 1947            | 2.50                     | 250                    | 0.110                                                       | (Glud et al., 1994)            |
| S. Atlantic Geob 1721     | 3095            | 4.10                     | 250                    | 0.153                                                       | (Glud et al., 1994)            |
| S. Atlantic Geob 1702     | 3107            | 3.50                     | 250                    | 0.066                                                       | (Glud et al., 1994)            |

|                                |      |       |     |       |                                                    |
|--------------------------------|------|-------|-----|-------|----------------------------------------------------|
| Aarhus Bay                     | 16   | 0.60  | 250 | 0.650 | (Thamdrup et al., 1994)                            |
| Arctic ocean-19/050            | 170  | 0.50  | 250 | 0.409 | (Hulth et al., 1994)                               |
| Arctic ocean-19/143            | 188  | 0.60  | 250 | 0.143 | (Hulth et al., 1994)                               |
| Arctic ocean-19/134            | 273  | 3.80  | 250 | 0.117 | (Hulth et al., 1994)                               |
| Arctic ocean-19/070            | 318  | 0.50  | 250 | 0.335 | (Hulth et al., 1994)                               |
| Arctic ocean-19/082            | 326  | 0.80  | 250 | 0.340 | (Hulth et al., 1994)                               |
| Arctic ocean-19/119            | 486  | 2.50  | 250 | 0.092 | (Hulth et al., 1994)                               |
| Arctic ocean-19/101            | 530  | 3.00  | 250 | 0.104 | (Hulth et al., 1994)                               |
| Arctic ocean-19/086            | 550  | 1.70  | 250 | 0.210 | (Hulth et al., 1994)                               |
| Arctic ocean-19/100            | 867  | 1.70  | 250 | 0.149 | (Hulth et al., 1994)                               |
| Arctic ocean-19/112            | 1010 | 3.70  | 250 | 0.067 | (Hulth et al., 1994)                               |
| Arctic ocean-19/078            | 2010 | 1.70  | 250 | 0.134 | (Hulth et al., 1994)                               |
| Arctic ocean-19/108            | 2490 | 6.00  | 250 | 0.110 | (Hulth et al., 1994)                               |
| Arctic ocean-19/098            | 2577 | 5.00  | 250 | 0.097 | (Hulth et al., 1994)                               |
| Amazon shelf RMT-1             | 9    | 0.15  | 250 | 0.440 | (Aller et al., 1996)                               |
| Amazon shelf OST-1             | 15   | 0.50  | 250 | 0.400 | (Aller et al., 1996)                               |
| Amazon shelf RMT-2             | 18   | 0.15  | 250 | 0.580 | (Aller et al., 1996)                               |
| Amazon shelf OST-2             | 20   | 0.50  | 250 | 0.390 | (Aller et al., 1996)                               |
| Amazon shelf OST-3             | 40   | 0.15  | 250 | 0.470 | (Aller et al., 1996)                               |
| Amazon shelf RMT-3             | 44   | 0.45  | 250 | 0.580 | (Aller et al., 1996)                               |
| Patton Escarpment, E.N.<br>PAC | 3750 | 3.00  | 250 | 0.065 | (Reimers et al., 1986; Reimers<br>and Suess, 1983) |
| Young Sound, Greenland         | 36   | 1.00  | 250 | 0.235 | (Rysgaard et al., 1998)                            |
| JGOFS 02S                      | 4300 | 5.00  | 250 | 0.020 | (Hammond et al., 1996)                             |
| JGOFS 02N                      | 4400 | 6.00  | 250 | 0.019 | (Hammond et al., 1996)                             |
| JGOFS 05N                      | 4500 | 10.00 | 250 | 0.011 | (Hammond et al., 1996)                             |
| JGOFS 00                       |      | 6.00  | 250 | 0.018 | (Hammond et al., 1996)                             |
| Northeast Atlantic StaI        | 668  | 0.80  | 250 | 0.086 | (Lohse et al., 1998)                               |
| Northeast Atlantic StaB        | 1023 | 1.60  | 250 | 0.054 | (Lohse et al., 1998)                               |
| Northeast Atlantic StaII       | 1442 | 2.50  | 250 | 0.065 | (Lohse et al., 1998)                               |
| Northeast Atlantic StaC        | 1989 | 3.50  | 250 | 0.039 | (Lohse et al., 1998)                               |

|                            |      |       |     |       |                               |
|----------------------------|------|-------|-----|-------|-------------------------------|
| Northeast Atlantic Sta III | 3719 | 5.50  | 250 | 0.057 | (Lohse et al., 1998)          |
| Northeast Atlantic StaE    | 4486 | 10.00 | 250 | 0.036 | (Lohse et al., 1998)          |
| Borderland Basins-PE       | 3707 | 2.00  | 131 | 0.014 | (Berelson et al., 1996)       |
| Central Calif Sta M        | 3730 | 1.60  | 129 | 0.064 | (Reimers et al., 1992)        |
| East N. Pac NH14           | 114  | 0.40  | 127 | 0.670 | (Devol and Christensen, 1993) |
| Central Calif Sta H        | 3580 | 1.50  | 125 | 0.062 | (Reimers et al., 1992)        |
| East N. Pac NH 18          | 146  | 0.30  | 106 | 0.530 | (Devol and Christensen, 1993) |
| Central Calif Sta F        | 2000 | 1.10  | 75  | 0.056 | (Reimers et al., 1992)        |
| Central Calif Sta L        | 1890 | 0.90  | 72  | 0.053 | (Reimers et al., 1992)        |
| San Clemente Basin         | 1900 | 0.80  | 58  | 0.045 | (Bender et al., 1989)         |
| Borderland Basins-SCI      | 2053 | 0.70  | 58  | 0.040 | (Berelson et al., 1996)       |
| Central Calif Sta E        | 1570 | 0.80  | 50  | 0.048 | (Reimers et al., 1992)        |
| Central Calif Sta D        | 1440 | 1.00  | 33  | 0.035 | (Reimers et al., 1992)        |
| Central Calif Sta C        | 1200 | 0.40  | 26  | 0.048 | (Reimers et al., 1992)        |
| Central Calif Sta K        | 1000 | 0.50  | 20  | 0.043 | (Reimers et al., 1992)        |
| Central Calif Sta A        | 585  | 0.30  | 17  | 0.050 | (Reimers et al., 1992)        |

## References

- Aller, R. C., Blair, N. E., and Rude, P. D.: Remineralization rates, recycling, and storage of carbon in Amazon shelf sediments, *Cont Shelf Res*, 16, 753-786, 1996.
- Bender, M., Jahnke, R., Weiss, R., Martin, W., Heggie, D. T., Orchardo, J., and Sowers, T.: Organic carbon oxidation and benthic nitrogen and silica dynamics in San Clemente Basin, a continental borderland site, *Geochimica et Cosmochimica Acta*, 53, 685-697, 1989.
- Berelson, W. M., McManus, J., Coale, K. H., Johnson, K. S., Kilgore, T., Burdige, D., and Pilskaln, C.: Biogenic matter diagenesis on the sea floor: A comparison between two continental margin transects., *J Mar Res*, 54, 731-762, 1996.
- Canfield, D. E.: Sulfate reduction and oxic respiration in marine sediments: implications for organic carbon preservation in euxinic environments, *Deep-Sea Research*, 36, 121-138, 1989.
- Canfield, D. E., Jørgensen, B. B., Fossing, H., Glud, R., Gundersen, J., Ramsing, N. B., Thamdrup, B., Hansen, J. W., Nielsen, L. P., and Hall, P. O. J.: Pathways of organic carbon oxidation in three continental margin sediments, *Mar Geol*, 113, 27-40, 1993.
- Chanton, J. P., Martens, C. S., and Goldhaber, M. B.: Biogeochemical cycling in an organic-rich coastal marine basin. 8. A sulfur isotopic budget balanced by differential diffusion across the sediment-water interface, *Geochim Cosmochim Acta*, 51, 1201-1208, 1987.
- Devol, A. H. and Christensen, J. P.: Benthic fluxes and nitrogen cycling in sediments of the continental margin of the eastern North Pacific, *Journal of Marine Research*, 51, 345-372, 1993.
- Glud, R. N., Gundersen, J. K., Jørgensen, B. B., Revsbech, N. P., and Schultz, H. D.: Diffusive and total oxygen uptake of deep-sea sediments in the eastern South Atlantic Ocean: *in situ* and laboratory measurements, *Deep-Sea Research I*, 41, 1767-1788, 1994.
- Glud, R. N., Holby, O., Hoffmann, F., and Canfield, D. E.: Benthic mineralization and exchange in Arctic sediments (Svalbard, Norway), *Marine Ecology-Progress Series*, 173, 237-251, 1998.
- Hammond, D. E., McManus, J., Berelson, W. M., Kilgore, T. E., and Pope, R. H.: Early diagenesis of organic material in equatorial Pacific sediments: stoichiometry and kinetics, *Deep-sea research II*, 43, 1365-1412, 1996.
- Hulth, S., Blackburn, T. H., and Hall, P. O. J.: Arctic sediments (Svalbard): consumption and microdistribution of oxygen, *Mar Chem*, 46, 293-316, 1994.
- Jørgensen, B. B.: Case study-Aarhus Bay. In: *Eutrophication in Coastal Marine Ecosystems*, Jørgensen, B. B. and Richardson, K. (Eds.), American Geophysical Union, Washington DC, 1996.
- Jørgensen, B. B. and Revsbech, N. P.: Oxygen uptake, bacterial distribution, and carbon-nitrogen-sulfur cycling in sediments from the Baltic Sea-North Sea transition, *Ophelia*, 31, 29-49, 1989.
- Lohse, L., Helder, W., Epping, E. H. G., and Balzer, W.: Recycling of organic matter along shelf-slope transect across the N. W. European Continental Margin (Goban Spur), *Prog Oceanogr*, 42, 77-110, 1998.
- Murray, J. W. and Grundmanis, V.: Oxygen consumption in pelagic marine sediment, *Science*, 209, 1527-1530, 1980.
- Reimers, C. E.: An *in situ* microprofiling instrument for measuring interfacial porewater gradients: methods and oxygen profiles from the North Pacific ocean, *Deep-sea research*, 34, 2019-2035, 1987.

- Reimers, C. E., Fischer, K. M., Merewether, R., Smith, K. L., and Jahnke, R. A.: Oxygen microprofiles measured in situ in deep sea sediments, *Nature*, 320, 741-744, 1986.
- Reimers, C. E., Jahnke, R. A., and McCorkle, D. C.: Carbon fluxes and burial rates over the continental slope and rise off central California with implications for the global carbon cycle, *Global Biogeochem Cy*, 6, 199-224, 1992.
- Reimers, C. E. and Suess, E.: The partitioning of organic carbon fluxes and sedimentary organic matter decomposition rates in the ocean, *Mar Chem*, 13, 141-168, 1983.
- Rysgaard, S., Thamdrup, B., Risgaard-Petersen, N., Fossing, H., Berg, P., Christensen, P. B., and Dalsgaard, T.: Seasonal carbon and nutrient mineralization in a high-Arctic coastal marine sediment, Young Sound, Northeast Greenland, *Marine Ecology-Progress Series*, 175, 261-276, 1998.
- Sagemann, J., Jørgensen, B. B., and Greeff, O.: Temperature dependence and rates of sulfate reduction in cold sediments of Svalbard, Arctic Ocean, *Geomicrobiology Journal*, 15, 85-100, 1998.
- Thamdrup, B. and Canfield, D. E.: Pathways of carbon oxidation in continental margin sediments off central Chile, *Limnology and Oceanography*, 41, 1629-1650, 1996.
- Thamdrup, B., Fossing, H., and Jørgensen, B. B.: Manganese, iron, and sulfur cycling in a coastal marine sediment, Aarhus Bay, Denmark, *Geochim Cosmochim Acta*, 58, 5115-5129, 1994.
